# Supplementary material
Source: PubMed Central journal article supplement (PMC5015798)
Supplement: supp_nsw049_Supplementary_Data.pdf [file supp_nsw049_Supplementary_Data.pdf]

## **Supplementary Online Content**

### **Supplementary Methods**

**Table S1.** Significant Clusters of Group Activation in Reward Processing during the Food Incentive Delay Task using Whole-Brain Analysis

**Table S2.** Significant Clusters of Group Activation in Reward Processing during the Food Incentive Delay Task using a Region of Interest Analysis

**Table S3.** Significant Clusters of Group Activation in Reward Processing during the Monetary Incentive Delay Task using Whole-Brain Analysis

**Table S4.** Significant Clusters of Group Activation in Reward Processing during the Monetary Incentive Delay Task using a Region of interest Analysis

**Table S5.** Significant Clusters of Group Differences in Reward Processing during the Food Incentive Delay Task using Whole-Brain Analyses

**Table S6.** Overall performance during the FID and MID tasks

**Figure S1.** Masks used in Region of Interest Analysis and Extraction of Percent Signal Change

## Supplementary Methods

### Description of Monetary and Food Incentive Delay Task (MID/ FID task)

There were four blocks of reward tasks, consisting of 55 trials each. The block sequence was either SMSM (S=Snacks, M=Money), or MSMS, and was counterbalanced over the participants. The degree of potential rewards varied on three levels as indicated via graphical cues (Figure 1). In both tasks, each trial started with the presentation of a symbol (750 ms) indicating the amount of money/ number of snack-points (SP) they could win with a correct response (i.e., 1 EUR, 20 cents, 0 EUR, or 10 SP, 2 SP, 0SP, respectively). After an anticipation period (3.000 ms) participants had to correctly react to one of two symbols (triangle inclined to the right or to the left) with a left or right button press corresponding to the direction of the triangle (index or middle finger of dominant hand) within a fixed interval of 1.000 ms. This leads to a low task-difficulty with a very high success rate, independently of the reaction speed of the participant. In order to guarantee a steady rate of reward vs. non-reward throughout all participants, we used a probabilistic reward pattern, i.e. reward was not paid out in 30 predefined trials (out of the 80 reward trials). Immediately after target presentation, feedback appeared (1.500 ms), notifying participants about the amount of money/ snack points they had won and about their cumulative total. In order to increase statistical efficiency, trials were separated by jittered intertrial intervals (ITIs) ranging from 1 to 8 s, with a mean of 3.5 s. An incorrect button press resulted in zero pay-out, a penalty of -1 EUR/ -10 SP was applied if participants failed to react. In the MID task, participants were able to win a maximum of 30 EUR. In the FID task, the maximum amount to be won was 300 SP, with any snack of the basket being 50 SP worth. Before entering the scanner, participants performed a practice version of the task lasting three minutes for each

condition for which they received neither payment nor snacks (Figure 1). Additionally, participants performed a response inhibition task; the results of this task are reported elsewhere. During scanning, participants viewed visual stimuli on a projection screen via a mirror fixed to the head coil.

For Peer Review

**Table S1. Significant Clusters of Group Activation in Reward Processing during the Food Incentive Delay Task using Whole-Brain Analysis**

| Area                               | Anticipation of 10 vs. 0 Snack Points <sup>a</sup> |     |     |     |               | Receipt of 10 vs. 0 Snack Points <sup>b</sup> |     |     |     |               |
|------------------------------------|----------------------------------------------------|-----|-----|-----|---------------|-----------------------------------------------|-----|-----|-----|---------------|
|                                    | MNI Coordinates <sup>c</sup>                       |     |     |     | No. of voxels | MNI Coordinates <sup>c</sup>                  |     |     |     | No. of voxels |
|                                    | t                                                  | x   | y   | z   |               | t                                             | x   | y   | z   |               |
| <b>Healthy Controls (n=55)</b>     |                                                    |     |     |     |               |                                               |     |     |     |               |
| Right occipital medial cortex      | 5.24                                               | 33  | -70 | 18  | 1174          |                                               |     |     |     |               |
| Left occipital cortex              | 4.75                                               | -24 | -64 | 30  | 481           |                                               |     |     |     |               |
| Left anterior insula               | 4.24                                               | -30 | 17  | -10 | 173           |                                               |     |     |     |               |
| Right inferior parietal lobule     |                                                    |     |     |     |               | 7.02                                          | 30  | -67 | 46  | 339           |
| Left inferior parietal lobule      |                                                    |     |     |     |               | 5.47                                          | -27 | -61 | 42  | 256           |
| Right lateral orbitofrontal cortex |                                                    |     |     |     |               | 5.18                                          | 39  | 38  | -10 | 193           |
| Right inferior prefrontal cortex   |                                                    |     |     |     |               | 4.74                                          | 51  | 32  | 30  | 192           |

|                                 |     |     |   |    |     |
|---------------------------------|-----|-----|---|----|-----|
| Left inferior prefrontal cortex | 4.4 | -45 | 8 | 30 | 259 |
|---------------------------------|-----|-----|---|----|-----|

**Patients (n=56)**

|                        |      |    |     |    |     |
|------------------------|------|----|-----|----|-----|
| Right occipital cortex | 6.57 | 27 | -88 | -2 | 319 |
|------------------------|------|----|-----|----|-----|

|                       |      |     |     |   |     |
|-----------------------|------|-----|-----|---|-----|
| Left occipital cortex | 4.84 | -15 | -94 | 2 | 122 |
|-----------------------|------|-----|-----|---|-----|

|               |     |    |     |   |     |
|---------------|-----|----|-----|---|-----|
| Left thalamus | 4.3 | -3 | -22 | 2 | 120 |
|---------------|-----|----|-----|---|-----|

|                                |      |     |     |     |      |
|--------------------------------|------|-----|-----|-----|------|
| Left inferior occipital cortex | 10.8 | -39 | -67 | -10 | 1285 |
|--------------------------------|------|-----|-----|-----|------|

|                                |      |    |     |    |     |
|--------------------------------|------|----|-----|----|-----|
| Right inferior parietal lobule | 8.37 | 33 | -58 | 38 | 194 |
|--------------------------------|------|----|-----|----|-----|

|                                  |     |    |    |     |     |
|----------------------------------|-----|----|----|-----|-----|
| Left medial orbitofrontal cortex | 7.7 | -6 | 29 | -10 | 105 |
|----------------------------------|-----|----|----|-----|-----|

|                                 |      |     |   |    |     |
|---------------------------------|------|-----|---|----|-----|
| Left inferior prefrontal cortex | 7.59 | -42 | 5 | 30 | 151 |
|---------------------------------|------|-----|---|----|-----|

|                           |      |   |    |    |    |
|---------------------------|------|---|----|----|----|
| Anterior cingulate cortex | 7.57 | 0 | -1 | 30 | 34 |
|---------------------------|------|---|----|----|----|

|                                  |      |    |    |    |    |
|----------------------------------|------|----|----|----|----|
| Right inferior prefrontal cortex | 7.54 | 39 | 32 | 18 | 54 |
|----------------------------------|------|----|----|----|----|

|                                  |      |     |     |     |    |
|----------------------------------|------|-----|-----|-----|----|
| Left anterior insula             | 7.47 | -33 | 11  | -10 | 24 |
| Right anterior insula            | 7.44 | 33  | 14  | -10 | 72 |
| Right frontal inferior operculum | 7.35 | 45  | 14  | 30  | 41 |
| Medial cingulate cortex          | 6.94 | 0   | -34 | 34  | 39 |
| Left anterior cingulate cortex   | 6.86 | -3  | 38  | 26  | 83 |
| Left medial prefrontal cortex    | 6.74 | -6  | 59  | 10  | 18 |

---

<sup>a</sup>thresholded at  $p < 0.001$  uncorrected for the control and patient group.

<sup>b</sup>thresholded at  $p < 0.001$  FWE corrected for the patient group and at  $p < 0.001$  uncorrected for the control group.

<sup>c</sup>MNI=Montreal Neurological Institute.

**Table S2. Significant Clusters of Group Activation in Reward Processing during the Food Incentive Delay Task using a Region of Interest Analysis<sup>a</sup>**

| Area                               | Anticipation of 10 vs. 0 Snack Points <sup>b</sup> |     |    |    |               | Receipt of 10 vs. 0 Snack Points <sup>c</sup> |     |    |     |               |
|------------------------------------|----------------------------------------------------|-----|----|----|---------------|-----------------------------------------------|-----|----|-----|---------------|
|                                    | MNI Coordinates <sup>d</sup>                       |     |    |    | No. of voxels | MNI Coordinates <sup>d</sup>                  |     |    |     | No. of voxels |
|                                    | t                                                  | x   | y  | z  |               | t                                             | x   | y  | z   |               |
| <b>Healthy Controls (n=55)</b>     |                                                    |     |    |    |               |                                               |     |    |     |               |
| Right nucleus caudatus             | 4.03                                               | 15  | 8  | 18 | 26            |                                               |     |    |     |               |
| Left nucleus caudatus              | 3.96                                               | -15 | 23 | 2  | 29            |                                               |     |    |     |               |
| Right lateral orbitofrontal cortex |                                                    |     |    |    |               | 5.18                                          | 39  | 38 | -10 | 102           |
| Left lateral orbitofrontal cortex  |                                                    |     |    |    |               | 4.31                                          | -45 | 47 | -2  | 78            |
| <b>Patients (n=56)</b>             |                                                    |     |    |    |               |                                               |     |    |     |               |
| Medial orbitofrontal cortex        |                                                    |     |    |    |               | 7.7                                           | -6  | 29 | -10 | 219           |
| Right lateral orbitofrontal cortex |                                                    |     |    |    |               | 7.37                                          | 30  | 35 | -14 | 134           |

Left lateral orbitofrontal cortex

6.59 -39 41 -14 90

---

<sup>a</sup>Regions of interest: bilateral striatum during the expectation of a reward, medial and lateral orbitofrontal cortex during the receipt of a reward.

<sup>b</sup>thresholded at  $p < 0.001$  uncorrected for the control and patient group.

<sup>c</sup>thresholded at  $p < 0.001$  FWE corrected for the patient group and at  $p < .001$  uncorrected for the control group.

<sup>d</sup>MNI=Montreal Neurological Institute.

For Peer Review



**Table S3. Significant Clusters of Group Activation in Reward Processing during the Monetary Incentive Delay Task using Whole-Brain Analysis**

| Area                                 | Anticipation of 1 vs. 0 Euro <sup>a</sup> |     |     |    |               | Receipt of 10 vs. 0 Euro <sup>b</sup> |     |     |    |               |
|--------------------------------------|-------------------------------------------|-----|-----|----|---------------|---------------------------------------|-----|-----|----|---------------|
|                                      | MNI Coordinates <sup>c</sup>              |     |     |    | No. of voxels | MNI Coordinates <sup>c</sup>          |     |     |    | No. of voxels |
|                                      | t                                         | x   | y   | z  |               | t                                     | x   | y   | z  |               |
| <b>Healthy Controls (n=55)</b>       |                                           |     |     |    |               |                                       |     |     |    |               |
| Right occipital medial cortex        | 5.67                                      | 33  | -73 | 10 | 321           |                                       |     |     |    |               |
| Left occipital medial cortex         | 5.12                                      | -30 | -82 | 18 | 278           |                                       |     |     |    |               |
| Thalamus                             | 4.64                                      | 0   | -34 | -2 | 184           |                                       |     |     |    |               |
| Right dorsolateral prefrontal cortex |                                           |     |     |    |               | 8.83                                  | 45  | 38  | 18 | 710           |
| Left frontal inferior operculum      |                                           |     |     |    |               | 8.04                                  | -42 | 5   | 26 | 220           |
| Right angular gyrus                  |                                           |     |     |    |               | 7.82                                  | 33  | -61 | 42 | 385           |
| Left angular gyrus                   |                                           |     |     |    |               | 7.62                                  | -30 | -61 | 42 | 262           |

|                                 |      |     |     |     |     |
|---------------------------------|------|-----|-----|-----|-----|
| Right anterior cingulate cortex | 6.86 | 9   | 35  | 14  | 375 |
| Right medial cingulate cortex   | 6.58 | 3   | -40 | 34  | 62  |
| Left insula                     | 5.74 | -30 | 11  | -14 | 20  |
| Right nucleus caudatus          | 5.73 | 12  | 11  | 6   | 19  |
| Left nucleus caudatus           | 5.49 | -12 | 8   | 6   | 16  |

***Patients (n=56)***

|                                 |      |     |     |    |     |
|---------------------------------|------|-----|-----|----|-----|
| Left thalamus                   | 6.2  | -6  | -22 | 2  | 605 |
| Left occipital medial cortex    | 5.12 | -33 | -79 | 26 | 259 |
| Right occipital inferior cortex | 4.91 | 30  | -88 | -6 | 601 |
| Left insula                     | 4.78 | -30 | 23  | -2 | 103 |
| Right angular gyrus             | 8.4  | 36  | -67 | 46 | 424 |

|                                  |      |     |     |     |     |
|----------------------------------|------|-----|-----|-----|-----|
| Left angular gyrus               | 7.41 | -30 | -64 | 42  | 234 |
| Right temporal medial cortex     | 7.72 | 57  | -49 | -6  | 200 |
| Right occipital inferior cortex  | 6.13 | 27  | -94 | -2  | 15  |
| Left occipital inferior cortex   | 7.64 | -45 | -64 | -14 | 282 |
| Right frontal inferior operculum | 7.3  | 48  | 14  | 30  | 372 |
| Left frontal inferior operculum  | 6.25 | -48 | 8   | 34  | 171 |
| Right medial cingulate cortex    | 6.25 | 3   | -1  | 26  | 25  |
| Right hippocampus                | 5.75 | 21  | -34 | -2  | 24  |
| Anterior cingulate cortex        | 5.43 | 0   | 38  | -2  | 70  |
| Medial cingulate cortex          | 5.27 | 0   | -31 | 38  | 12  |
| Parahippocampal gyrus            | 5.19 | -6  | -31 | 6   | 10  |

---

<sup>a</sup>thresholded at  $p < 0.001$  uncorrected for the control and patient group.

---

<sup>b</sup>thresholded at  $p < 0.001$  FWE corrected for the control and patient group.

<sup>c</sup>MNI=Montreal Neurological Institute.

For Peer Review

**Table S4. Significant Clusters of Group Activation in Reward Processing during the Monetary Incentive Delay Task using a Region of interest Analysis<sup>a</sup>**

| Area                                      | Anticipation of 1 vs. 0 Euro <sup>b</sup> |   |   |   |               | Receipt of 1 vs. 0 Euro <sup>c</sup> |    |    |     |               |
|-------------------------------------------|-------------------------------------------|---|---|---|---------------|--------------------------------------|----|----|-----|---------------|
|                                           | MNI Coordinates <sup>d</sup>              |   |   |   | No. of voxels | MNI Coordinates <sup>a</sup>         |    |    |     | No. of voxels |
|                                           | t                                         | x | y | z |               | t                                    | x  | y  | z   |               |
| <b>Healthy Controls (n=55)</b>            |                                           |   |   |   |               |                                      |    |    |     |               |
| Medial orbitofrontal cortex               |                                           |   |   |   |               | 6.57                                 | 6  | 35 | -2  | 108           |
| Right lateral medial orbitofrontal cortex |                                           |   |   |   |               | 6.53                                 | 24 | 47 | -14 | 116           |
| <b>Patients (n=56)</b>                    |                                           |   |   |   |               |                                      |    |    |     |               |
| Medial orbitofrontal cortex               |                                           |   |   |   |               | 5.43                                 | 0  | 38 | -2  | 31            |
| Right lateral orbitofrontal cortex        |                                           |   |   |   |               | 6.02                                 | 42 | 53 | -2  | 28            |

<sup>a</sup>Regions of interest: bilateral striatum during the expectation of a reward, medial and lateral orbitofrontal cortex during the receipt of a reward.

<sup>b</sup>thresholded at  $p < 0.001$  uncorrected for the control and patient group.

---

<sup>c</sup>thresholded at  $p < 0.001$  FWE corrected for the control and patient group

<sup>d</sup>MNI=Montreal Neurological Institute.

For Peer Review

**Table S5. Significant Clusters of Group Differences in Reward Processing during the Food Incentive Delay**

**Task using Whole-Brain Analyses**

| Contrast and Area                      | Anticipation of 10 vs. 0 Snack Points |                              |     |    |               | Receipt of 10 vs. 0 Snack Points |                              |     |    |               |
|----------------------------------------|---------------------------------------|------------------------------|-----|----|---------------|----------------------------------|------------------------------|-----|----|---------------|
|                                        | t                                     | MNI Coordinates <sup>a</sup> |     |    | No. of voxels | t                                | MNI Coordinates <sup>a</sup> |     |    | No. of voxels |
|                                        |                                       | x                            | y   | z  |               |                                  | x                            | y   | z  |               |
| <b>Healthy Controls &gt; Patients</b>  |                                       |                              |     |    |               |                                  |                              |     |    |               |
| Right posterior cingulate cortex       | 4.72                                  | 9                            | -40 | 14 | 102           |                                  |                              |     |    |               |
| <b>Patients &gt; Healthy Controls</b>  |                                       |                              |     |    |               |                                  |                              |     |    |               |
| Left posterior cingulate cortex        |                                       |                              |     |    |               | 4.85                             | -6                           | -55 | 6  | 413           |
| Left anterior medial prefrontal cortex |                                       |                              |     |    |               | 4.29                             | -3                           | 59  | 10 | 69            |
| Left supramarginal/ angular gyrus      |                                       |                              |     |    |               | 4.05                             | -48                          | -52 | 30 | 61            |

<sup>a</sup> MNI=Montreal Neurological Institute.

**Table S6. Overall performance during the FID and MID tasks.**

|                 | BTE patients (N=55)     |                       |             |           | Healthy controls (N=56) |                       |             |           | P reaction time | P errors |
|-----------------|-------------------------|-----------------------|-------------|-----------|-------------------------|-----------------------|-------------|-----------|-----------------|----------|
|                 | Mean reaction time (ms) | SD reaction time (ms) | Mean errors | SD errors | Mean reaction time (ms) | SD reaction time (ms) | Mean errors | SD errors |                 |          |
| 10 Snack points | 477                     | 82                    | .87         | 1.62      | 481                     | 84                    | .67         | 1.2       | .773            | .457     |
| 0 Snack points  | 485                     | 83                    | .54         | .91       | 483                     | 73                    | .82         | 1.17      | .895            | .159     |
| EUR 1           | 476                     | 88                    | .61         | 1.04      | 475                     | 87                    | .63         | 1.13      | .966            | .887     |
| EUR 0           | 484                     | 83                    | .45         | .89       | 480                     | 69                    | .6          | 1.05      | .791            | .407     |



**Figure S1: Masks used in Region of Interest Analysis and Extraction of Percent Signal Change**

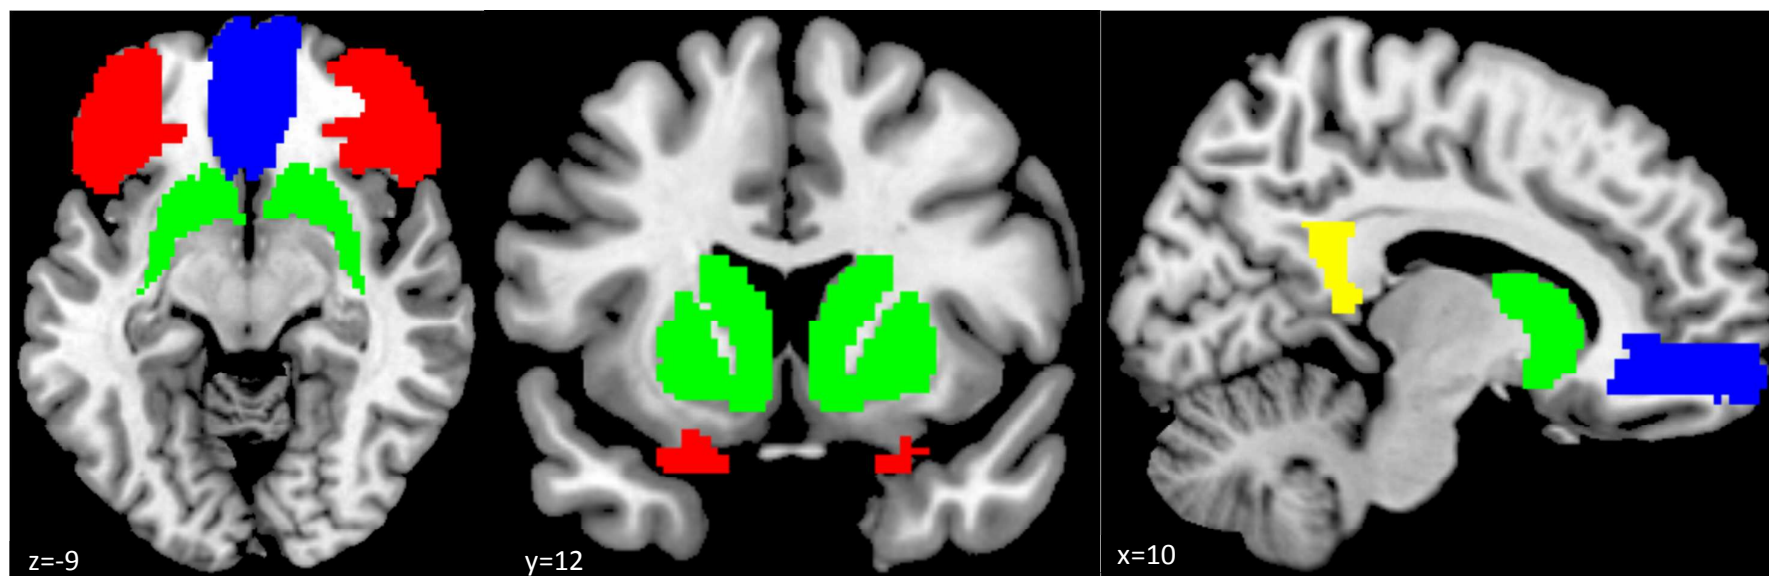

Bilateral striatum mask depicted in green (consisting of the bilateral caudatus and bilateral putamen taken from the AAL atlas), medial orbitofrontal cortex mask depicted in blue (consisting of portions of the frontal medial OFC and anterior cingulate cortex taken from the AAL atlas. To ensure specificity, portions of the mOFC ROI which were located dorsal from the MNI  $z = 0$  line were subtracted), lateral orbitofrontal cortex mask depicted in red (consisting of the bilateral orbital part of the inferior frontal gyrus and the orbital part of the middle frontal gyrus taken from the AAL atlas) and posterior cingulate cortex depicted in yellow (taken from the AAL atlas). The posterior cingulate cortex was only used for the extraction of percent signal change.
